# Supplementary material for: Feedback effects of boundary-layer meteorological factors on explosive growth of PM 2.5 during winter heavy pollution episodes in Beijing from 2013 to 2016
Source: Copernicus journal article supplement (doi:10.5194/acp-2017-845), 2017-09-15
Supplement: Supplementary file 1 [file acp-2017-845-supplement.pdf]

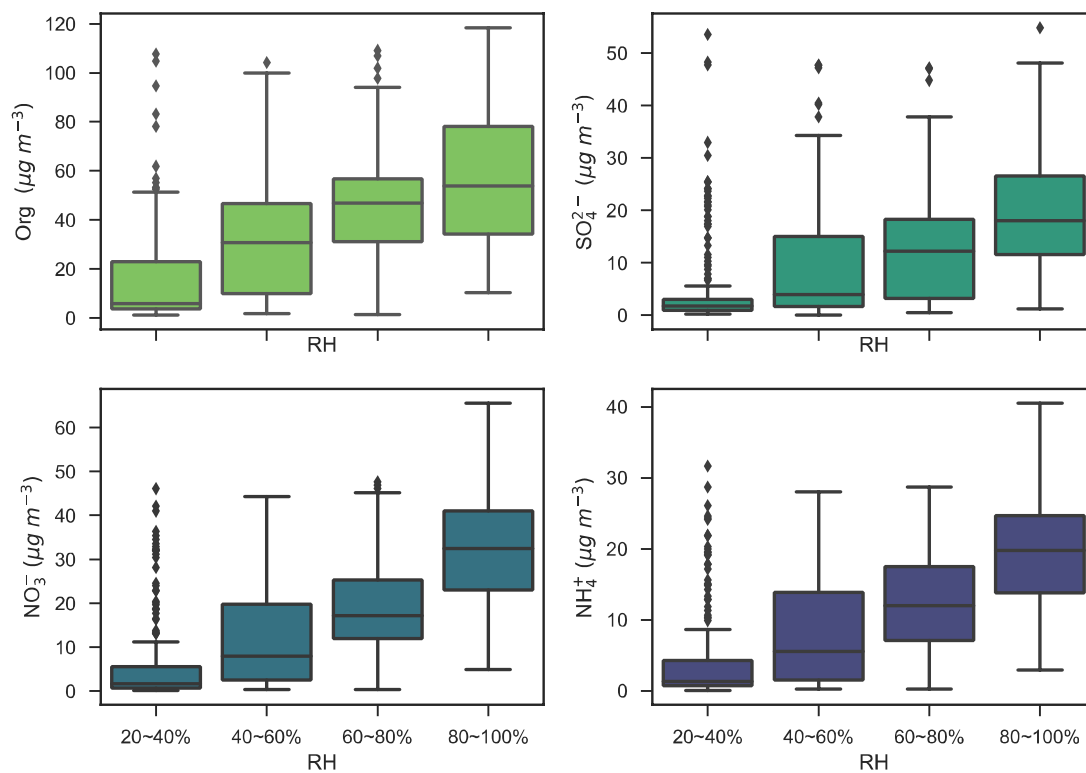

Figure S1. The distributions of aerosol species in  $PM_{10}$  in different ranges of RH from 1 December 2016 to 3 January 2017.

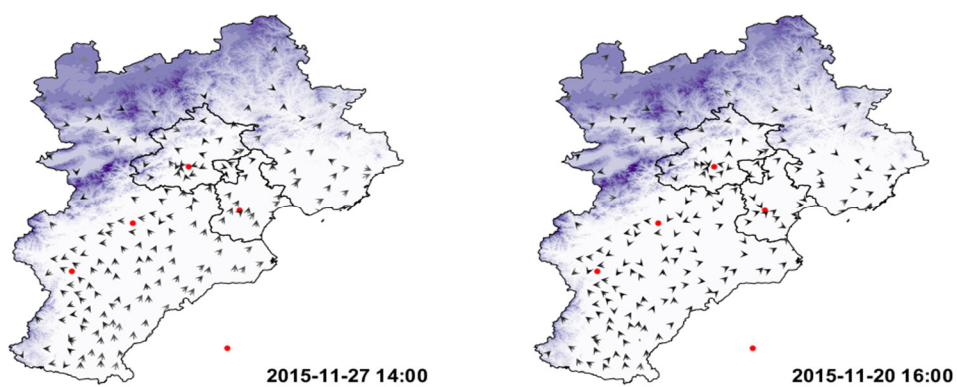

Figure S2. Surface wind distributions during the convergent explosive growth processes in November and December 2015 in the North China Plain.
